# Supplementary material
Source: publisher site journal article supplement (https://www.dovepress.com/article/573036)
Supplement: Supplementary file 1 [file 573036%20Revised%20_Supplementary..docx]

**Supplementary File**

Table S1. Study Quality ….2

Table S2. PRISMA Check List ……..3

Table S3. Search terms and strategies for each database 5

Table S4**.** Syntaxes, Search terms and strategies for each database………………….…...…….......8

**Table S1.** Study Quality JBI Appraisal for Scoping Review

| Author | Design | 1 | 2 | 3 | 4 | 5 | 6 | 7 | 8 | 9 | 10 | 11 | Total Yes | "Interpretation ≥ 80% High quality 60–79% Moderate quality < 60% Low quality" |
| --- | --- | --- | --- | --- | --- | --- | --- | --- | --- | --- | --- | --- | --- | --- |
| Dapkekar et al. (2023)1 | Case-control | Y | N | Y | Y | Y | Y | Y | Y | Y | Y | - | 90 | High |
| Charishma and Agarwal (2022)2 | Case-control | Y | N | Y | Y | Y | Y | U | Y | Y | Y | - | 80 | High |
| Maqsood et al. (2025)3 | Case-control | Y | N | Y | Y | Y | Y | Y | Y | Y | Y | - | 90 | High |
| Pratiwi et al. (2021)4 | Case-control | Y | N | Y | Y | Y | Y | Y | Y | Y | Y | - | 90 | High |
| Falcão et al (2021)5 | Cohort | Y | Y | Y | Y | Y | Y | Y | Y | Y | N/A | Y | 91 | High |
| Odendaal et al. (2024)6 | Cohort | Y | Y | Y | Y | Y | Y | Y | Y | N | Y | Y | 91 | High |
| Karatlı et al (2024)7 | Cohort | Y | Y | Y | Y | Y | Y | Y | Y | Y | N/A | Y | 91 | High |
| Debere et al. (2022)8 | cross-sectional | Y | Y | U | Y | Y | Y | U | Y |  |  |  | 75 | Moderate |
| Huang et al. (2025)9 | cross-sectional | Y | Y | N | Y | Y | Y | N | Y |  |  |  | 75 | Moderate |
| Idueta L. et al. (2021)10 | cross-sectional | Y | Y | Y | Y | Y | Y | Y | Y |  |  |  | 100 | High |
| Irvin et al. (2022)11 | cross-sectional | Y | Y | U | Y | Y | Y | Y | Y |  |  |  | 87.5 | High |
| Lai et al. (2022)12 | cross-sectional | Y | Y | N | Y | Y | Y | Y | Y |  |  |  | 87.5 | High |
| Nadhiroh et al. (2024)13 | cross-sectional | Y | Y | U | Y | Y | Y | Y | Y |  |  |  | 87.5 | High |
| Paudel et al. (2020)14 | cross-sectional | Y | Y | U | Y | N | Y | U | Y |  |  |  | 62.5 | Moderate |
| Tesfa et al. (2020)15 | cross-sectional | Y | Y | Y | Y | Y | Y | Y | Y |  |  |  | 100 | High |
| Toulany et al. (2025)16 | cross-sectional | Y | Y | Y | Y | Y | Y | Y | Y |  |  |  | 100 | High |
| Xiang et al. (2024)17 | cross-sectional | Y | Y | U | Y | Y | Y | Y | Y |  |  |  | 87.5 | High |

**Table S2.** PRISMA for Scoping Reviews Checklist

| **SECTION** | **ITEM** | **PRISMA-ScR CHECKLIST ITEM** | **REPORTED ON PAGE #** |
| --- | --- | --- | --- |
| **TITLE** | | | |
| Title | 1 | Identify the report as a scoping review. | YES (Page 1) |
| **ABSTRACT** | | | |
| Structured summary | 2 | Provide a structured summary that includes (as applicable): background, objectives, eligibility criteria, sources of evidence, charting methods, results, and conclusions that relate to the review questions and objectives. | Yes Page 1 |
| **INTRODUCTION** | | | |
| Rationale | 3 | Describe the rationale for the review in the context of what is already known. Explain why the review questions/objectives lend themselves to a scoping review approach. | Page 3-4 |
| Objectives | 4 | Provide an explicit statement of the questions and objectives being addressed with reference to their key elements (e.g., population or participants, concepts, and context) or other relevant key elements used to conceptualize the review questions and/or objectives. | Page 4 |
| **METHODS** | | | |
| Protocol and registration | 5 | Indicate whether a review protocol exists; state if and where it can be accessed (e.g., a Web address); and if available, provide registration information, including the registration number. | No |
| Eligibility criteria | 6 | Specify characteristics of the sources of evidence used as eligibility criteria (e.g., years considered, language, and publication status), and provide a rationale. | Page 4, table 1 |
| Information sources* | 7 | Describe all information sources in the search (e.g., databases with dates of coverage and contact with authors to identify additional sources), as well as the date the most recent search was executed. | Page 5-6 |
| Search | 8 | Present the full electronic search strategy for at least 1 database, including any limits used, such that it could be repeated. | Supplementary 1, Page 4 |
| Selection of sources of evidence† | 9 | State the process for selecting sources of evidence (i.e., screening and eligibility) included in the scoping review. | Page 5-6 |
| Data charting process‡ | 10 | Describe the methods of charting data from the included sources of evidence (e.g., calibrated forms or forms that have been tested by the team before their use, and whether data charting was done independently or in duplicate) and any processes for obtaining and confirming data from investigators. | Page 6 |
| Data items | 11 | List and define all variables for which data were sought and any assumptions and simplifications made. | Page 6 |
| Critical appraisal of individual sources of evidence§ | 12 | If done, provide a rationale for conducting a critical appraisal of included sources of evidence; describe the methods used and how this information was used in any data synthesis (if appropriate). | Page 5 |
| Synthesis of results | 13 | Describe the methods of handling and summarizing the data that were charted. | Figure 2 |
| **RESULTS** | | | |
| Selection of sources of evidence | 14 | Give numbers of sources of evidence screened, assessed for eligibility, and included in the review, with reasons for exclusions at each stage, ideally using a flow diagram. | Figure 1 |
| Characteristics of sources of evidence | 15 | For each source of evidence, present characteristics for which data were charted and provide the citations. | Page 8-9 |
| Critical appraisal within sources of evidence | 16 | If done, present data on critical appraisal of included sources of evidence (see item 12). | Page 5 |
| Results of individual sources of evidence | 17 | For each included source of evidence, present the relevant data that were charted that relate to the review questions and objectives. | Page 8-11 |
| Synthesis of results | 18 | Summarize and/or present the charting results as they relate to the review questions and objectives. | Page 11-15 |
| **DISCUSSION** | | | |
| Summary of evidence | 19 | Summarize the main results (including an overview of concepts, themes, and types of evidence available), link to the review questions and objectives, and consider the relevance to key groups. | Page 8-12 |
| Limitations | 20 | Discuss the limitations of the scoping review process. | Page 15 |
| Conclusions | 21 | Provide a general interpretation of the results with respect to the review questions and objectives, as well as potential implications and/or next steps. | Page 15 |
| **FUNDING** | | | |
| Funding | 22 | Describe sources of funding for the included sources of evidence, as well as sources of funding for the scoping review. Describe the role of the funders of the scoping review. | Page 15 |

JBI = Joanna Briggs Institute; PRISMA-ScR = Preferred Reporting Items for Systematic reviews and Meta-Analyses extension for Scoping Reviews.

* Where sources of evidence such as bibliographic databases, social media platforms, and Web sites.

† A more inclusive/heterogeneous term used to account for the different types of evidence or data sources (e.g., quantitative and/or qualitative research, expert opinion, and policy documents) that may be eligible in a scoping review as opposed to only studies. This is not to be confused with information sources.

‡ The frameworks by Arksey and O’Malley (6) and Levac and colleagues (7) and the JBI guidance (4, 5) refer to the process of data extraction in a scoping review as data charting.

§ The process of systematically examining research evidence to assess its validity, results, and relevance before using it to inform a decision. This term is used for items 12 and 19 instead of "risk of bias" (which is more applicable to systematic reviews of interventions) to include and acknowledge the various sources of evidence that may be used in a scoping review (e.g., quantitative and/or qualitative research, expert opinion, and policy documents

**Table S3.** Keywordsfor each database

| **Databases** | **Population** | **Concept** | **Context** | **Study** |
| --- | --- | --- | --- | --- |
| PubMed (MeSH) | pregnant people (mesh)  pregnancy (mesh)  pregnant wom*n  antenatal wom*n  prenatal wom*n  fetus (mesh)  infant (mesh)  infant*  newborn*  neonate*  young infant*  Infant, Small for Gestational Age (mesh)  Infant, Low Birth Weight (mesh)  Fetal Growth Retardation (mesh)  Infant, Premature (mesh)  fetal growth restriction  intrauterine growth restriction  IUGR  small for gestational age  SGA  growth faltering  postnatal growth faltering  infant growth faltering  low birth weight  LBW | risk factors (mesh)  risk factor*  population at risk  risk scor*  maternal risk factor*  paternal risk factors*  maternal factor*  paternal factor*  maternal characteristic*  paternal characteristic*  maternal exposure*  paternal exposure*  maternal determinant*  paternal determinant* | developing countries (mesh)  low- and middle-income countr*  low income countr*  middle income countr*  LMIC*  resource-limited setting*  resource-poor setting*  developing nation*  developing region* | observational  cross-sectional studies (mesh)  cross-sectional  cohort studies (mesh)  cohort  case-control studies (mesh)  case control  randomized controlled trial*  random*  random assignment  controlled trial |
| Scopus | pregnant people (mesh)  pregnant people (mesh)  pregnancy (mesh)  pregnant wom*n  antenatal wom*n  prenatal wom*n  fetus (mesh)  infant (mesh)  infant*  newborn*  neonate*  young infant*  Infant, Small for Gestational Age(sh)  Infant, Low Birth Weight (mesh)  Fetal Growth Retardation (mesh)  Infant, Premature (mesh)  fetal growth restriction  intrauterine growth restriction  IUGR  small for gestational age  SGA  growth faltering  postnatal growth faltering  infant growth faltering  low birth weight  LBW | risk factors (mesh)  risk factor*  population at risk  risk scor*  maternal risk factor*  paternal risk factors*  maternal factor*  paternal factor*  maternal characteristic*  paternal characteristic*  maternal exposure*  paternal exposure*  maternal determinant*  paternal determinant* | developing countries (mesh)  low- and middle-income countr*  low income countr*  middle income countr*  LMIC*  resource-limited setting*  resource-poor setting*  developing nation*  developing region* | observational  cross-sectional studies (mesh)  cross-sectional  cohort studies (mesh)  cohort  case-control studies (mesh)  case control  randomized controlled trial*  random*  random assignment  controlled trial |
| Web of Science | pregnant people  pregnancy  pregnant wom*n  antenatal wom*n  prenatal wom*n  fetus  infant  infant*  newborn*  neonate*  young infant*  fetal growth restriction  intrauterine growth restriction  IUGR  small for gestational age  SGA  growth faltering  postnatal growth faltering  infant growth faltering  low birth weight  LBW | risk factors  risk factor*  population at risk  risk scor*  maternal risk factor*  paternal risk factors*  maternal factor*  paternal factor*  maternal characteristic*  paternal characteristic*  maternal exposure*  paternal exposure*  maternal determinant*  paternal determinant* | developing countries  low- and middle-income countr*  low income countr*  middle income countr*  LMIC*  resource-limited setting*  resource-poor setting*  developing nation*  developing region* | observational  cross-sectional studies  cross-sectional  cohort studies  cohort  case-control studies  case control  randomized controlled trial*  random*  random assignment  controlled trial |

**Table S4.** Syntaxes, Search terms and strategies for each database

| Databases | Syntaxes | Number | Total |
| --- | --- | --- | --- |
| PubMed | ((((((((((((((((((((((((((((((((((((((((((((((((((((((((("pregnant people"[MeSH Terms]) OR ("pregnant people"[Text Word])) OR ("pregnant people"[Title/Abstract])) OR (pregnancy[MeSH Terms])) OR (pregnancy[Text Word])) OR (pregnancy[Title/Abstract])) OR ("pregnant wom*n"[Title/Abstract])) OR ("pregnant wom*n"[Text Word])) OR ("antenatal wom*n"[Text Word])) OR ("antenatal wom*n"[Title/Abstract])) OR ("prenatal wom*n"[Title/Abstract])) OR ("prenatal wom*n"[Text Word])) OR (fetus[Text Word])) OR (fetus[Title/Abstract])) OR (fetus[MeSH Terms])) OR (infant[MeSH Terms])) OR (infant[Text Word])) OR (infant[Title/Abstract])) OR (infant*[Title/Abstract])) OR (infant*[Text Word])) OR (newborn*[Text Word])) OR (newborn*[Title/Abstract])) OR (neonate*[Title/Abstract])) OR (neonate*[Text Word])) OR ("young infant*"[Text Word])) OR ("young infant*"[Title/Abstract])) ) OR ("Infant, Small for Gestational Age"[MeSH Terms])) OR ("Infant, Small for Gestational Age"[Text Word])) OR ("Infant, Small for Gestational Age"[Title/Abstract])) OR ("Infant, Low Birth Weight"[MeSH Terms])) OR ("Infant, Low Birth Weight"[Text Word])) OR ("Infant, Low Birth Weight"[Title/Abstract])) OR ("Fetal Growth Retardation"[Title/Abstract])) OR ("Fetal Growth Retardation"[MeSH Terms])) OR ("Fetal Growth Retardation"[Text Word])) OR ("Infant, Premature"[MeSH Terms])) OR ("Infant, Premature"[Text Word])) OR ("Infant, Premature"[Title/Abstract])) OR ("fetal growth restriction"[Title/Abstract])) OR ("fetal growth restriction"[Text Word])) OR ("intrauterine growth restriction"[Text Word])) OR ("intrauterine growth restriction"[Title/Abstract])) OR (IUGR[Title/Abstract])) OR (IUGR[Text Word])) OR ("small for gestational age"[Text Word])) OR ("small for gestational age"[Title/Abstract])) OR (SGA[Title/Abstract])) OR (SGA[Text Word])) OR ("growth faltering"[Text Word])) OR ("growth faltering"[Title/Abstract])) OR ("postnatal growth faltering"[Title/Abstract])) OR ("postnatal growth faltering"[Text Word])) OR ("infant growth faltering"[Text Word])) OR ("infant growth faltering"[Title/Abstract])) OR ("low birth weight"[Title/Abstract])) OR ("low birth weight"[Text Word])) OR (LBW[Text Word]) OR (LBW[Title/Abstract]) | 2,631,272 |  |
|  | (((((((((((((((((((((((((((("risk factors"[MeSH Terms]) OR ("risk factors"[Text Word])) OR ("risk factors"[Title/Abstract])) OR ("risk factor*"[Text Word])) OR ("risk factor*"[Title/Abstract])) OR ("population at risk"[Title/Abstract])) OR ("population at risk"[Text Word])) OR ("risk scor*"[Text Word])) OR ("risk scor*"[Title/Abstract])) OR ("maternal risk factor*"[Title/Abstract])) OR ("maternal risk factor*"[Text Word])) OR ("paternal risk factors*"[Text Word])) OR ("paternal risk factors*"[Title/Abstract])) OR ("maternal factor*"[Title/Abstract])) OR ("maternal factor*"[Text Word])) OR ("paternal factor*"[Text Word])) OR ("paternal factor*"[Title/Abstract])) OR ("maternal characteristic*"[Title/Abstract])) OR ("maternal characteristic*"[Text Word])) OR ("paternal characteristic*"[Text Word])) OR ("paternal characteristic*"[Title/Abstract])) OR ("maternal exposure*"[Title/Abstract])) OR ("maternal exposure*"[Text Word])) OR ("paternal exposure*"[Text Word])) OR ("paternal exposure*"[Title/Abstract])) OR ("maternal determinant*"[Title/Abstract])) OR ("maternal determinant*"[Text Word])) OR ("paternal determinant*"[Text Word])) OR ("paternal determinant*"[Title/Abstract]) | 1,630,559 |  |
|  | (((((((((((((((((("developing countries"[MeSH Terms]) OR ("developing countries"[Text Word])) OR ("developing countries"[Title/Abstract])) OR ("low- and middle-income countr*"[Title/Abstract])) OR ("low- and middle-income countr*"[Text Word])) OR ("low income countr*"[Text Word])) OR ("low income countr*"[Title/Abstract])) OR ("middle income countr*"[Title/Abstract])) OR ("middle income countr*"[Text Word])) OR (LMIC*[Text Word])) OR (LMIC*[Title/Abstract])) OR ("resource-limited setting*"[Title/Abstract])) OR ("resource-limited setting*"[Text Word])) OR ("resource-poor setting*"[Text Word])) OR ("resource-poor setting*"[Title/Abstract])) OR ("developing nation*"[Title/Abstract])) OR ("developing nation*"[Text Word])) OR ("developing region*"[Text Word])) OR ("developing region*"[Title/Abstract]) | 217,998 |  |
|  | ((((((((((((((((((observational[Title/Abstract]) OR (observational[Text Word])) OR ("cross-sectional studies"[MeSH Terms])) OR ("cross-sectional"[Title/Abstract])) OR ("cross-sectional"[Text Word])) OR ("cohort studies"[MeSH Terms])) OR (cohort[Title/Abstract])) OR (cohort[Text Word])) OR ("case-control studies"[MeSH Terms])) OR ("case control"[Title/Abstract])) OR ("case control"[Text Word])) OR ("randomized controlled trial*"[Title/Abstract])) OR ("randomized controlled trial*"[Text Word])) OR (random*[Title/Abstract])) OR (random*[Text Word])) OR ("random assignment"[Title/Abstract])) OR ("random assignment"[Text Word])) OR ("controlled trial"[Title/Abstract])) OR ("controlled trial"[Text Word]) | 5,898,154 |  |
|  | (((((((((((((((((((((((((((((((((((((((((((((((((((((((((((("pregnant people"[MeSH Terms]) OR ("pregnant people"[Text Word])) OR ("pregnant people"[Title/Abstract])) OR (pregnancy[MeSH Terms])) OR (pregnancy[Text Word])) OR (pregnancy[Title/Abstract])) OR ("pregnant wom*n"[Title/Abstract])) OR ("pregnant wom*n"[Text Word])) OR ("antenatal wom*n"[Text Word])) OR ("antenatal wom*n"[Title/Abstract])) OR ("prenatal wom*n"[Title/Abstract])) OR ("prenatal wom*n"[Text Word])) OR (fetus[Text Word])) OR (fetus[Title/Abstract])) OR (fetus[MeSH Terms])) OR (infant[MeSH Terms])) OR (infant[Text Word])) OR (infant[Title/Abstract])) OR (infant*[Title/Abstract])) OR (infant*[Text Word])) OR (newborn*[Text Word])) OR (newborn*[Title/Abstract])) OR (neonate*[Title/Abstract])) OR (neonate*[Text Word])) OR ("young infant*"[Text Word])) OR ("young infant*"[Title/Abstract])) ) OR ("Infant, Small for Gestational Age"[MeSH Terms])) OR ("Infant, Small for Gestational Age"[Text Word])) OR ("Infant, Small for Gestational Age"[Title/Abstract])) OR ("Infant, Low Birth Weight"[MeSH Terms])) OR ("Infant, Low Birth Weight"[Text Word])) OR ("Infant, Low Birth Weight"[Title/Abstract])) OR ("Fetal Growth Retardation"[Title/Abstract])) OR ("Fetal Growth Retardation"[MeSH Terms])) OR ("Fetal Growth Retardation"[Text Word])) OR ("Infant, Premature"[MeSH Terms])) OR ("Infant, Premature"[Text Word])) OR ("Infant, Premature"[Title/Abstract])) OR ("fetal growth restriction"[Title/Abstract])) OR ("fetal growth restriction"[Text Word])) OR ("intrauterine growth restriction"[Text Word])) OR ("intrauterine growth restriction"[Title/Abstract])) OR (IUGR[Title/Abstract])) OR (IUGR[Text Word])) OR ("small for gestational age"[Text Word])) OR ("small for gestational age"[Title/Abstract])) OR (SGA[Title/Abstract])) OR (SGA[Text Word])) OR ("growth faltering"[Text Word])) OR ("growth faltering"[Title/Abstract])) OR ("postnatal growth faltering"[Title/Abstract])) OR ("postnatal growth faltering"[Text Word])) OR ("infant growth faltering"[Text Word])) OR ("infant growth faltering"[Title/Abstract])) OR ("low birth weight"[Title/Abstract])) OR ("low birth weight"[Text Word])) OR (LBW[Text Word]) OR (LBW[Title/Abstract])) AND ((((((((((((((((((((((((((((("risk factors"[MeSH Terms]) OR ("risk factors"[Text Word])) OR ("risk factors"[Title/Abstract])) OR ("risk factor*"[Text Word])) OR ("risk factor*"[Title/Abstract])) OR ("population at risk"[Title/Abstract])) OR ("population at risk"[Text Word])) OR ("risk scor*"[Text Word])) OR ("risk scor*"[Title/Abstract])) OR ("maternal risk factor*"[Title/Abstract])) OR ("maternal risk factor*"[Text Word])) OR ("paternal risk factors*"[Text Word])) OR ("paternal risk factors*"[Title/Abstract])) OR ("maternal factor*"[Title/Abstract])) OR ("maternal factor*"[Text Word])) OR ("paternal factor*"[Text Word])) OR ("paternal factor*"[Title/Abstract])) OR ("maternal characteristic*"[Title/Abstract])) OR ("maternal characteristic*"[Text Word])) OR ("paternal characteristic*"[Text Word])) OR ("paternal characteristic*"[Title/Abstract])) OR ("maternal exposure*"[Title/Abstract])) OR ("maternal exposure*"[Text Word])) OR ("paternal exposure*"[Text Word])) OR ("paternal exposure*"[Title/Abstract])) OR ("maternal determinant*"[Title/Abstract])) OR ("maternal determinant*"[Text Word])) OR ("paternal determinant*"[Text Word])) OR ("paternal determinant*"[Title/Abstract]))) AND ((((((((((((((((((("developing countries"[MeSH Terms]) OR ("developing countries"[Text Word])) OR ("developing countries"[Title/Abstract])) OR ("low- and middle-income countr*"[Title/Abstract])) OR ("low- and middle-income countr*"[Text Word])) OR ("low income countr*"[Text Word])) OR ("low income countr*"[Title/Abstract])) OR ("middle income countr*"[Title/Abstract])) OR ("middle income countr*"[Text Word])) OR (LMIC*[Text Word])) OR (LMIC*[Title/Abstract])) OR ("resource-limited setting*"[Title/Abstract])) OR ("resource-limited setting*"[Text Word])) OR ("resource-poor setting*"[Text Word])) OR ("resource-poor setting*"[Title/Abstract])) OR ("developing nation*"[Title/Abstract])) OR ("developing nation*"[Text Word])) OR ("developing region*"[Text Word])) OR ("developing region*"[Title/Abstract]))) AND (((((((((((((((((((observational[Title/Abstract]) OR (observational[Text Word])) OR ("cross-sectional studies"[MeSH Terms])) OR ("cross-sectional"[Title/Abstract])) OR ("cross-sectional"[Text Word])) OR ("cohort studies"[MeSH Terms])) OR (cohort[Title/Abstract])) OR (cohort[Text Word])) OR ("case-control studies"[MeSH Terms])) OR ("case control"[Title/Abstract])) OR ("case control"[Text Word])) OR ("randomized controlled trial*"[Title/Abstract])) OR ("randomized controlled trial*"[Text Word])) OR (random*[Title/Abstract])) OR (random*[Text Word])) OR ("random assignment"[Title/Abstract])) OR ("random assignment"[Text Word])) OR ("controlled trial"[Title/Abstract])) OR ("controlled trial"[Text Word])) | 3915 |  |
|  | (((((((((((((((((((((((((((((((((((((((((((((((((((((((((((("pregnant people"[MeSH Terms]) OR ("pregnant people"[Text Word])) OR ("pregnant people"[Title/Abstract])) OR (pregnancy[MeSH Terms])) OR (pregnancy[Text Word])) OR (pregnancy[Title/Abstract])) OR ("pregnant wom*n"[Title/Abstract])) OR ("pregnant wom*n"[Text Word])) OR ("antenatal wom*n"[Text Word])) OR ("antenatal wom*n"[Title/Abstract])) OR ("prenatal wom*n"[Title/Abstract])) OR ("prenatal wom*n"[Text Word])) OR (fetus[Text Word])) OR (fetus[Title/Abstract])) OR (fetus[MeSH Terms])) OR (infant[MeSH Terms])) OR (infant[Text Word])) OR (infant[Title/Abstract])) OR (infant*[Title/Abstract])) OR (infant*[Text Word])) OR (newborn*[Text Word])) OR (newborn*[Title/Abstract])) OR (neonate*[Title/Abstract])) OR (neonate*[Text Word])) OR ("young infant*"[Text Word])) OR ("young infant*"[Title/Abstract])) ) OR ("Infant, Small for Gestational Age"[MeSH Terms])) OR ("Infant, Small for Gestational Age"[Text Word])) OR ("Infant, Small for Gestational Age"[Title/Abstract])) OR ("Infant, Low Birth Weight"[MeSH Terms])) OR ("Infant, Low Birth Weight"[Text Word])) OR ("Infant, Low Birth Weight"[Title/Abstract])) OR ("Fetal Growth Retardation"[Title/Abstract])) OR ("Fetal Growth Retardation"[MeSH Terms])) OR ("Fetal Growth Retardation"[Text Word])) OR ("Infant, Premature"[MeSH Terms])) OR ("Infant, Premature"[Text Word])) OR ("Infant, Premature"[Title/Abstract])) OR ("fetal growth restriction"[Title/Abstract])) OR ("fetal growth restriction"[Text Word])) OR ("intrauterine growth restriction"[Text Word])) OR ("intrauterine growth restriction"[Title/Abstract])) OR (IUGR[Title/Abstract])) OR (IUGR[Text Word])) OR ("small for gestational age"[Text Word])) OR ("small for gestational age"[Title/Abstract])) OR (SGA[Title/Abstract])) OR (SGA[Text Word])) OR ("growth faltering"[Text Word])) OR ("growth faltering"[Title/Abstract])) OR ("postnatal growth faltering"[Title/Abstract])) OR ("postnatal growth faltering"[Text Word])) OR ("infant growth faltering"[Text Word])) OR ("infant growth faltering"[Title/Abstract])) OR ("low birth weight"[Title/Abstract])) OR ("low birth weight"[Text Word])) OR (LBW[Text Word]) OR (LBW[Title/Abstract])) AND ((((((((((((((((((((((((((((("risk factors"[MeSH Terms]) OR ("risk factors"[Text Word])) OR ("risk factors"[Title/Abstract])) OR ("risk factor*"[Text Word])) OR ("risk factor*"[Title/Abstract])) OR ("population at risk"[Title/Abstract])) OR ("population at risk"[Text Word])) OR ("risk scor*"[Text Word])) OR ("risk scor*"[Title/Abstract])) OR ("maternal risk factor*"[Title/Abstract])) OR ("maternal risk factor*"[Text Word])) OR ("paternal risk factors*"[Text Word])) OR ("paternal risk factors*"[Title/Abstract])) OR ("maternal factor*"[Title/Abstract])) OR ("maternal factor*"[Text Word])) OR ("paternal factor*"[Text Word])) OR ("paternal factor*"[Title/Abstract])) OR ("maternal characteristic*"[Title/Abstract])) OR ("maternal characteristic*"[Text Word])) OR ("paternal characteristic*"[Text Word])) OR ("paternal characteristic*"[Title/Abstract])) OR ("maternal exposure*"[Title/Abstract])) OR ("maternal exposure*"[Text Word])) OR ("paternal exposure*"[Text Word])) OR ("paternal exposure*"[Title/Abstract])) OR ("maternal determinant*"[Title/Abstract])) OR ("maternal determinant*"[Text Word])) OR ("paternal determinant*"[Text Word])) OR ("paternal determinant*"[Title/Abstract]))) AND ((((((((((((((((((("developing countries"[MeSH Terms]) OR ("developing countries"[Text Word])) OR ("developing countries"[Title/Abstract])) OR ("low- and middle-income countr*"[Title/Abstract])) OR ("low- and middle-income countr*"[Text Word])) OR ("low income countr*"[Text Word])) OR ("low income countr*"[Title/Abstract])) OR ("middle income countr*"[Title/Abstract])) OR ("middle income countr*"[Text Word])) OR (LMIC*[Text Word])) OR (LMIC*[Title/Abstract])) OR ("resource-limited setting*"[Title/Abstract])) OR ("resource-limited setting*"[Text Word])) OR ("resource-poor setting*"[Text Word])) OR ("resource-poor setting*"[Title/Abstract])) OR ("developing nation*"[Title/Abstract])) OR ("developing nation*"[Text Word])) OR ("developing region*"[Text Word])) OR ("developing region*"[Title/Abstract]))) AND (((((((((((((((((((observational[Title/Abstract]) OR (observational[Text Word])) OR ("cross-sectional studies"[MeSH Terms])) OR ("cross-sectional"[Title/Abstract])) OR ("cross-sectional"[Text Word])) OR ("cohort studies"[MeSH Terms])) OR (cohort[Title/Abstract])) OR (cohort[Text Word])) OR ("case-control studies"[MeSH Terms])) OR ("case control"[Title/Abstract])) OR ("case control"[Text Word])) OR ("randomized controlled trial*"[Title/Abstract])) OR ("randomized controlled trial*"[Text Word])) OR (random*[Title/Abstract])) OR (random*[Text Word])) OR ("random assignment"[Title/Abstract])) OR ("random assignment"[Text Word])) OR ("controlled trial"[Title/Abstract])) OR ("controlled trial"[Text Word])) |  |  |
|  | (((((((((((((((((((((((((((((((((((((((((((((((((((((((((((("pregnant people"[MeSH Terms]) OR ("pregnant people"[Text Word])) OR ("pregnant people"[Title/Abstract])) OR (pregnancy[MeSH Terms])) OR (pregnancy[Text Word])) OR (pregnancy[Title/Abstract])) OR ("pregnant wom*n"[Title/Abstract])) OR ("pregnant wom*n"[Text Word])) OR ("antenatal wom*n"[Text Word])) OR ("antenatal wom*n"[Title/Abstract])) OR ("prenatal wom*n"[Title/Abstract])) OR ("prenatal wom*n"[Text Word])) OR (fetus[Text Word])) OR (fetus[Title/Abstract])) OR (fetus[MeSH Terms])) OR (infant[MeSH Terms])) OR (infant[Text Word])) OR (infant[Title/Abstract])) OR (infant*[Title/Abstract])) OR (infant*[Text Word])) OR (newborn*[Text Word])) OR (newborn*[Title/Abstract])) OR (neonate*[Title/Abstract])) OR (neonate*[Text Word])) OR ("young infant*"[Text Word])) OR ("young infant*"[Title/Abstract])) ) OR ("Infant, Small for Gestational Age"[MeSH Terms])) OR ("Infant, Small for Gestational Age"[Text Word])) OR ("Infant, Small for Gestational Age"[Title/Abstract])) OR ("Infant, Low Birth Weight"[MeSH Terms])) OR ("Infant, Low Birth Weight"[Text Word])) OR ("Infant, Low Birth Weight"[Title/Abstract])) OR ("Fetal Growth Retardation"[Title/Abstract])) OR ("Fetal Growth Retardation"[MeSH Terms])) OR ("Fetal Growth Retardation"[Text Word])) OR ("Infant, Premature"[MeSH Terms])) OR ("Infant, Premature"[Text Word])) OR ("Infant, Premature"[Title/Abstract])) OR ("fetal growth restriction"[Title/Abstract])) OR ("fetal growth restriction"[Text Word])) OR ("intrauterine growth restriction"[Text Word])) OR ("intrauterine growth restriction"[Title/Abstract])) OR (IUGR[Title/Abstract])) OR (IUGR[Text Word])) OR ("small for gestational age"[Text Word])) OR ("small for gestational age"[Title/Abstract])) OR (SGA[Title/Abstract])) OR (SGA[Text Word])) OR ("growth faltering"[Text Word])) OR ("growth faltering"[Title/Abstract])) OR ("postnatal growth faltering"[Title/Abstract])) OR ("postnatal growth faltering"[Text Word])) OR ("infant growth faltering"[Text Word])) OR ("infant growth faltering"[Title/Abstract])) OR ("low birth weight"[Title/Abstract])) OR ("low birth weight"[Text Word])) OR (LBW[Text Word]) OR (LBW[Title/Abstract])) AND ((((((((((((((((((((((((((((("risk factors"[MeSH Terms]) OR ("risk factors"[Text Word])) OR ("risk factors"[Title/Abstract])) OR ("risk factor*"[Text Word])) OR ("risk factor*"[Title/Abstract])) OR ("population at risk"[Title/Abstract])) OR ("population at risk"[Text Word])) OR ("risk scor*"[Text Word])) OR ("risk scor*"[Title/Abstract])) OR ("maternal risk factor*"[Title/Abstract])) OR ("maternal risk factor*"[Text Word])) OR ("paternal risk factors*"[Text Word])) OR ("paternal risk factors*"[Title/Abstract])) OR ("maternal factor*"[Title/Abstract])) OR ("maternal factor*"[Text Word])) OR ("paternal factor*"[Text Word])) OR ("paternal factor*"[Title/Abstract])) OR ("maternal characteristic*"[Title/Abstract])) OR ("maternal characteristic*"[Text Word])) OR ("paternal characteristic*"[Text Word])) OR ("paternal characteristic*"[Title/Abstract])) OR ("maternal exposure*"[Title/Abstract])) OR ("maternal exposure*"[Text Word])) OR ("paternal exposure*"[Text Word])) OR ("paternal exposure*"[Title/Abstract])) OR ("maternal determinant*"[Title/Abstract])) OR ("maternal determinant*"[Text Word])) OR ("paternal determinant*"[Text Word])) OR ("paternal determinant*"[Title/Abstract]))) AND ((((((((((((((((((("developing countries"[MeSH Terms]) OR ("developing countries"[Text Word])) OR ("developing countries"[Title/Abstract])) OR ("low- and middle-income countr*"[Title/Abstract])) OR ("low- and middle-income countr*"[Text Word])) OR ("low income countr*"[Text Word])) OR ("low income countr*"[Title/Abstract])) OR ("middle income countr*"[Title/Abstract])) OR ("middle income countr*"[Text Word])) OR (LMIC*[Text Word])) OR (LMIC*[Title/Abstract])) OR ("resource-limited setting*"[Title/Abstract])) OR ("resource-limited setting*"[Text Word])) OR ("resource-poor setting*"[Text Word])) OR ("resource-poor setting*"[Title/Abstract])) OR ("developing nation*"[Title/Abstract])) OR ("developing nation*"[Text Word])) OR ("developing region*"[Text Word])) OR ("developing region*"[Title/Abstract]))) AND (((((((((((((((((((observational[Title/Abstract]) OR (observational[Text Word])) OR ("cross-sectional studies"[MeSH Terms])) OR ("cross-sectional"[Title/Abstract])) OR ("cross-sectional"[Text Word])) OR ("cohort studies"[MeSH Terms])) OR (cohort[Title/Abstract])) OR (cohort[Text Word])) OR ("case-control studies"[MeSH Terms])) OR ("case control"[Title/Abstract])) OR ("case control"[Text Word])) OR ("randomized controlled trial*"[Title/Abstract])) OR ("randomized controlled trial*"[Text Word])) OR (random*[Title/Abstract])) OR (random*[Text Word])) OR ("random assignment"[Title/Abstract])) OR ("random assignment"[Text Word])) OR ("controlled trial"[Title/Abstract])) OR ("controlled trial"[Text Word])) Filters: in the last 5 years | 1092 |  |
| Scopus | TITLE-ABS-KEY ( "pregnant people" ) OR TITLE-ABS-KEY ( pregnancy ) OR TITLE-ABS-KEY ( "pregnant wom*" ) OR TITLE-ABS-KEY ( "antenatal wom*" ) OR TITLE-ABS-KEY ( "prenatal wom*" ) OR TITLE-ABS-KEY ( fetus ) OR TITLE-ABS-KEY ( infant ) OR TITLE-ABS-KEY ( infant* ) OR TITLE-ABS-KEY ( newborn* ) OR TITLE-ABS-KEY ( neonate* ) OR TITLE-ABS-KEY ( "young infant*" ) OR TITLE-ABS-KEY ( "Infant, Small for Gestational Age" ) OR TITLE-ABS-KEY ( "Infant, Low Birth Weight" ) OR TITLE-ABS-KEY ( "Fetal Growth Retardation" ) OR TITLE-ABS-KEY ( "Infant, Premature" ) OR TITLE-ABS-KEY ( "fetal growth restriction" ) OR TITLE-ABS-KEY ( "intrauterine growth restriction" ) OR TITLE-ABS-KEY ( IUGR ) OR TITLE-ABS-KEY ( "small for gestational age" ) OR TITLE-ABS-KEY ( SGA ) OR TITLE-ABS-KEY ( "growth faltering" ) OR TITLE-ABS-KEY ( "postnatal growth faltering" ) OR TITLE-ABS-KEY ( "infant growth faltering" ) OR TITLE-ABS-KEY ( "low birth weight" ) OR TITLE-ABS-KEY ( LBW ) | 3,152,025 |  |
|  | TITLE-ABS-KEY ( "risk factors" ) OR TITLE-ABS-KEY ( "risk factor*" ) OR TITLE-ABS-KEY ( "population at risk" ) OR TITLE-ABS-KEY ( "risk scor*" ) OR TITLE-ABS-KEY ( "maternal risk factor*" ) OR TITLE-ABS-KEY ( "paternal risk factor*" ) OR TITLE-ABS-KEY ( "maternal factor*" ) OR TITLE-ABS-KEY ( "paternal factor*" ) OR TITLE-ABS-KEY ( "maternal characteristic*" ) OR TITLE-ABS-KEY ( "paternal characteristic*" ) OR TITLE-ABS-KEY ( "maternal exposure*" ) OR TITLE-ABS-KEY ( "paternal exposure*" ) OR TITLE-ABS-KEY ( "maternal determinant*" ) OR TITLE-ABS-KEY ( "paternal determinant*" ) | 2,226,482 |  |
|  | TITLE-ABS-KEY ( "developing countries" ) OR TITLE-ABS-KEY ( "low- and middle-income countr*" ) OR TITLE-ABS-KEY ( "low income countr*" ) OR TITLE-ABS-KEY ( "middle income countr*" ) OR TITLE-ABS-KEY ( LMIC* ) OR TITLE-ABS-KEY ( "resource-limited setting*" ) OR TITLE-ABS-KEY ( "resource-poor setting*" ) OR TITLE-ABS-KEY ( "developing nation*" ) OR TITLE-ABS-KEY ( "developing region*" ) | 471,592 |  |
|  | ( TITLE-ABS-KEY ( observational ) OR TITLE-ABS-KEY ( cross-sectional ) OR TITLE-ABS-KEY ( cohort ) OR TITLE-ABS-KEY ( case-control ) OR TITLE-ABS-KEY ( "randomized controlled trial*" ) OR TITLE-ABS-KEY ( random* ) OR TITLE-ABS-KEY ( "random assignment" ) OR TITLE-ABS-KEY ( "controlled trial" ) ) | 6,841,197 |  |
|  | ( TITLE-ABS-KEY ( "pregnant people" ) OR TITLE-ABS-KEY ( pregnancy ) OR TITLE-ABS-KEY ( "pregnant wom*" ) OR TITLE-ABS-KEY ( "antenatal wom*" ) OR TITLE-ABS-KEY ( "prenatal wom*" ) OR TITLE-ABS-KEY ( fetus ) OR TITLE-ABS-KEY ( infant ) OR TITLE-ABS-KEY ( infant* ) OR TITLE-ABS-KEY ( newborn* ) OR TITLE-ABS-KEY ( neonate* ) OR TITLE-ABS-KEY ( "young infant*" ) OR TITLE-ABS-KEY ( "Infant, Small for Gestational Age" ) OR TITLE-ABS-KEY ( "Infant, Low Birth Weight" ) OR TITLE-ABS-KEY ( "Fetal Growth Retardation" ) OR TITLE-ABS-KEY ( "Infant, Premature" ) OR TITLE-ABS-KEY ( "fetal growth restriction" ) OR TITLE-ABS-KEY ( "intrauterine growth restriction" ) OR TITLE-ABS-KEY ( IUGR ) OR TITLE-ABS-KEY ( "small for gestational age" ) OR TITLE-ABS-KEY ( SGA ) OR TITLE-ABS-KEY ( "growth faltering" ) OR TITLE-ABS-KEY ( "postnatal growth faltering" ) OR TITLE-ABS-KEY ( "infant growth faltering" ) OR TITLE-ABS-KEY ( "low birth weight" ) OR TITLE-ABS-KEY ( LBW ) ) AND ( TITLE-ABS-KEY ( "risk factors" ) OR TITLE-ABS-KEY ( "risk factor*" ) OR TITLE-ABS-KEY ( "population at risk" ) OR TITLE-ABS-KEY ( "risk scor*" ) OR TITLE-ABS-KEY ( "maternal risk factor*" ) OR TITLE-ABS-KEY ( "paternal risk factor*" ) OR TITLE-ABS-KEY ( "maternal factor*" ) OR TITLE-ABS-KEY ( "paternal factor*" ) OR TITLE-ABS-KEY ( "maternal characteristic*" ) OR TITLE-ABS-KEY ( "paternal characteristic*" ) OR TITLE-ABS-KEY ( "maternal exposure*" ) OR TITLE-ABS-KEY ( "paternal exposure*" ) OR TITLE-ABS-KEY ( "maternal determinant*" ) OR TITLE-ABS-KEY ( "paternal determinant*" ) ) AND ( TITLE-ABS-KEY ( "developing countries" ) OR TITLE-ABS-KEY ( "low- and middle-income countr*" ) OR TITLE-ABS-KEY ( "low income countr*" ) OR TITLE-ABS-KEY ( "middle income countr*" ) OR TITLE-ABS-KEY ( LMIC* ) OR TITLE-ABS-KEY ( "resource-limited setting*" ) OR TITLE-ABS-KEY ( "resource-poor setting*" ) OR TITLE-ABS-KEY ( "developing nation*" ) OR TITLE-ABS-KEY ( "developing region*" ) ) AND ( ( TITLE-ABS-KEY ( observational ) OR TITLE-ABS-KEY ( cross-sectional ) OR TITLE-ABS-KEY ( cohort ) OR TITLE-ABS-KEY ( case-control ) OR TITLE-ABS-KEY ( "randomized controlled trial*" ) OR TITLE-ABS-KEY ( random* ) OR TITLE-ABS-KEY ( "random assignment" ) OR TITLE-ABS-KEY ( "controlled trial" ) ) ) | 4,448 |  |
|  | ( TITLE-ABS-KEY ( "pregnant people" ) OR TITLE-ABS-KEY ( pregnancy ) OR TITLE-ABS-KEY ( "pregnant wom*" ) OR TITLE-ABS-KEY ( "antenatal wom*" ) OR TITLE-ABS-KEY ( "prenatal wom*" ) OR TITLE-ABS-KEY ( fetus ) OR TITLE-ABS-KEY ( infant ) OR TITLE-ABS-KEY ( infant* ) OR TITLE-ABS-KEY ( newborn* ) OR TITLE-ABS-KEY ( neonate* ) OR TITLE-ABS-KEY ( "young infant*" ) OR TITLE-ABS-KEY ( "Infant, Small for Gestational Age" ) OR TITLE-ABS-KEY ( "Infant, Low Birth Weight" ) OR TITLE-ABS-KEY ( "Fetal Growth Retardation" ) OR TITLE-ABS-KEY ( "Infant, Premature" ) OR TITLE-ABS-KEY ( "fetal growth restriction" ) OR TITLE-ABS-KEY ( "intrauterine growth restriction" ) OR TITLE-ABS-KEY ( IUGR ) OR TITLE-ABS-KEY ( "small for gestational age" ) OR TITLE-ABS-KEY ( SGA ) OR TITLE-ABS-KEY ( "growth faltering" ) OR TITLE-ABS-KEY ( "postnatal growth faltering" ) OR TITLE-ABS-KEY ( "infant growth faltering" ) OR TITLE-ABS-KEY ( "low birth weight" ) OR TITLE-ABS-KEY ( LBW ) ) AND ( TITLE-ABS-KEY ( "risk factors" ) OR TITLE-ABS-KEY ( "risk factor*" ) OR TITLE-ABS-KEY ( "population at risk" ) OR TITLE-ABS-KEY ( "risk scor*" ) OR TITLE-ABS-KEY ( "maternal risk factor*" ) OR TITLE-ABS-KEY ( "paternal risk factor*" ) OR TITLE-ABS-KEY ( "maternal factor*" ) OR TITLE-ABS-KEY ( "paternal factor*" ) OR TITLE-ABS-KEY ( "maternal characteristic*" ) OR TITLE-ABS-KEY ( "paternal characteristic*" ) OR TITLE-ABS-KEY ( "maternal exposure*" ) OR TITLE-ABS-KEY ( "paternal exposure*" ) OR TITLE-ABS-KEY ( "maternal determinant*" ) OR TITLE-ABS-KEY ( "paternal determinant*" ) ) AND ( TITLE-ABS-KEY ( "developing countries" ) OR TITLE-ABS-KEY ( "low- and middle-income countr*" ) OR TITLE-ABS-KEY ( "low income countr*" ) OR TITLE-ABS-KEY ( "middle income countr*" ) OR TITLE-ABS-KEY ( LMIC* ) OR TITLE-ABS-KEY ( "resource-limited setting*" ) OR TITLE-ABS-KEY ( "resource-poor setting*" ) OR TITLE-ABS-KEY ( "developing nation*" ) OR TITLE-ABS-KEY ( "developing region*" ) ) AND ( ( TITLE-ABS-KEY ( observational ) OR TITLE-ABS-KEY ( cross-sectional ) OR TITLE-ABS-KEY ( cohort ) OR TITLE-ABS-KEY ( case-control ) OR TITLE-ABS-KEY ( "randomized controlled trial*" ) OR TITLE-ABS-KEY ( random* ) OR TITLE-ABS-KEY ( "random assignment" ) OR TITLE-ABS-KEY ( "controlled trial" ) ) ) AND PUBYEAR > 2019 AND PUBYEAR < 2026 | 2002 |  |
| Web of Science | 1: (((((((((((((((((((((ALL=("pregnant people")) OR ALL=("pregnancy")) OR ALL=("pregnant wom*n")) OR ALL=("antenatal wom*n")) OR ALL=("prenatal wom*n")) OR ALL=(fetus)) OR ALL=(infant)) OR ALL=(infant*)) OR ALL=(newborn*)) OR ALL=(neonate*)) OR ALL=(young infant*)) OR ALL=("fetal growth restriction")) OR ALL=("intrauterine growth restriction")) OR ALL=(iUGR)) OR ALL=("small for gestational age ")) OR ALL=(SGA )) OR ALL=("growth faltering")) OR ALL=("postnatal growth faltering")) OR ALL=("infant growth faltering")) OR ALL=("low birth weight"))) OR ALL=(LBW) | 1,556,028 |  |
|  | 2: **(((((((((((((ALL=("risk factors")) OR ALL=("risk factor*")) OR ALL=("population at risk")) OR ALL=("risk scor*")) OR ALL=("maternal risk factor*")) OR ALL=("paternal risk factors*")) OR ALL=("maternal factor*")) OR ALL=("paternal factor*")) OR ALL=("maternal characteristic*")) OR ALL=("paternal characteristic*")) OR ALL=("maternal exposure*")) OR ALL=("paternal exposure*")) OR ALL=("maternal determinant*")) OR ALL=("paternal determinant*")** | 1,371,932 |  |
|  | 3: ((((((((ALL=("developing countries")) OR ALL=("low- and middle-income countr*")) OR ALL=("low income countr*")) OR ALL=(middle income countr*)) OR ALL=(LMIC*)) OR ALL=("resource-limited setting*")) OR ALL=("resource-poor setting*")) OR ALL=("developing nation*")) OR ALL=("developing region*") | 308,629 |  |
|  | 4: ((((((((((ALL=(observational)) OR ALL=("cross-sectional studies")) OR ALL=("cross-sectional")) OR ALL=("cohort studies")) OR ALL=(cohort)) OR ALL=("case-control studies")) OR ALL=("case control")) OR ALL=("randomized controlled trial*")) OR ALL=(random*)) OR ALL=("random assignment")) OR ALL=("controlled trial") | 5,296,480 |  |
|  | 5: #1 AND #2 AND #3 and #4 | 2,158 |  |
|  | 6: : #1 AND #2 AND #3 and #4 Publication Years: 2025 or 2024 or 2022 or 2023 or 2021 or 2020 | 1,141 |  |
